# Supplementary material for: Clay mineralogical evidence for mid-latitude terrestrial climate change from the latest Cretaceous through the earliest Paleogene in the Songliao Basin, NE China
Source: Copernicus journal article supplement (doi:10.5194/cp-2020-36), 2020-03-17
Supplement: Supplementary file 1 [file Supplement.xls]

## Sheet: Gao et al. Appendix
Depth (m)	Age (Ma)	Lithology	Smectite	Illite	Kaolinite	Chlorite	Semc/Ill	Ill Chem	Clay/Q	Ill Crystal	Smec Crystal	Data Source*
220	64.974	green mudstone	97.9992	1.19829	0.40486	0.397677	81.7823	0.235442	82.35	0.288	1.108	This study
230	65.088	grey silty mudstone	94.0529	3.2295	1.53936	1.17825	29.123	0.343318	43.0713	0.232	1.127	This study
235	65.145	brown mudstone	97.041	1.9535	0.596673	0.408808	49.6753	0.432476	122.384	0.204	1.045	This study
240	65.202	grey mudstone	93.8707	2.30191	2.61308	1.2143	40.7795	0.414802	103.313	0.256	0.895	This study
245	65.258	green mudstone	96.5963	1.81248	0.87371	0.717474	53.2951	0.631905	117.176	0.233	1.196	This study
250	65.315	grey mudstone	99.2708	0.544261	0.126505	0.058451	182.395	0.239214	102.601	0.65	0.837	Gao et al., 2015
255	65.371	green mudstone	97.7803	1.31741	0.586261	0.315997	74.2219	0.512486	81.0101	0.219	1.357	This study
270	65.531	grey mudstone	97.2302	2.47542	0.231112	0.0632613	39.2782	0.319288	65.122	0.536	1.357	Gao et al., 2015
275	65.58	grey mudstone	97.9339	1.02806	0.354062	0.683977	95.2611	1.16454	20.3985	0.131	1.294	This study
280	65.625	grey mudstone	98.0293	0.975652	0.359296	0.635767	100.476	0.517684	108.969	0.305	1.1	Gao et al., 2015
290	65.713	grey mudstone	97.7994	1.13919	0.501772	0.559605	85.8498	0.726436	76.5429	0.229	1.441	Gao et al., 2015
293.5	65.744	red mudstone	92.5056	5.91216	0.456376	1.12588	15.6467	0.67238	12.0025	0.453	1.316	This study
298	65.788	green mudstone	97.0651	2.55174	0.235074	0.148098	38.0388	0.466967	73.6452	0.42	1.8	This study
300	65.809	red mudstone	98.191	1.66347	0.0541205	0.0914352	59.0278	0.402156	115.1	0.411	1.304	Gao et al., 2015
301	65.819	brown mudstone	96.6923	2.56479	0.347548	0.395394	37.6998	0.495258	35.8637	0.175	1.481	This study
305	65.861	brown mudstone	91.7583	6.70885	0.539296	0.993533	13.6772	0.282507	56.1105	0.466	1.304	This study
307	65.882	green mudstone	97.4465	2.00985	0.203605	0.340016	48.4844	0.568828	44.5815	0.17	1.408	This study
310	65.913	brown mudstone	98.7212	0.939098	0.134067	0.205602	105.123	0.372801	129.56	0.461	1.139	Gao et al., 2015
315	65.965	green mudstone	94.7962	4.19322	0.619095	0.391515	22.607	0.298787	116.815	0.357	1.261	This study
324	66.073	brown mudstone	76.2	15.9705	5.63829	2.19121	4.77129	0.411541	82.7785	0.276	2.217	This study
325	66.085	brown mudstone	77.8033	13.4832	5.29691	3.41654	5.77037	0.420004	67.7334	0.255	1.203	This study
326.5	66.085	brown mudstone	64.452	23.5417	7.01092	4.99537	2.73778	0.377361	25.5519	0.264	1.093	This study
327	66.109	brown mudstone	76.9334	15.2724	5.71241	2.08182	5.03742	0.301411	50.0224	0.244	1.237	This study
328	66.121	brown mudstone	80.9232	11.0528	5.23212	2.79185	7.32148	0.578993	67.0114	0.225	1.365	This study
329	66.133	brown mudstone	77.181	15.9072	3.77944	3.1324	4.85196	0.235326	62.4508	0.25	1.727	This study
330	66.145	brown mudstone	74.6495	19.4273	3.35889	2.56427	3.8425	0.266092	78.1467	0.305	1.041	Gao et al., 2015
331	66.157	brown mudstone	61.7118	28.4704	4.55899	5.25873	2.16758	0.274209	35.3776	0.259	1.034	This study
332	66.169	brown mudstone	78.556	12.3886	5.66899	3.38646	6.34102	0.83093	58.7882	0.282	1.661	This study
333	66.182	brown mudstone	90.2561	6.3137	2.4076	1.02262	14.2953	0.425645	154.667	0.201	0.942	This study
334	66.194	brown mudstone	89.8277	6.38023	2.47543	1.31668	14.0791	0.58098	113.979	0.294	0.912	This study
335	66.207	green mudstone	41.2663	51.0028	3.82886	3.90202	0.8091	0.237381	45.6508	0.346	0.645	This study
336	66.22	brown mudstone	84.3059	12.0712	2.01886	1.60401	6.98406	0.244915	75.914	0.25	2.007	This study
337	66.233	brown mudstone	49.2568	40.4074	5.72528	4.61055	1.219	0.264614	27.7815	0.277	0.593	This study
338	66.245	brown mudstone	66.8509	24.5753	4.95198	3.62188	2.72025	0.328679	25.4347	0.276	0.863	This study
339	66.258	brown mudstone	85.7547	8.90681	3.29452	2.04393	9.62799	0.472957	58.1515	0.259	1.408	This study
340	66.271	brown mudstone	63.4978	28.2368	3.21626	5.0492	2.24876	0.556594	26.807	0.581	1.026	Gao et al., 2015
341	66.283	brown mudstone	88.2	7.42343	3.41768	0.95888	11.8813	0.623439	79.1367	0.26	1.082	This study
342	66.296	brown mudstone	41.3462	45.0448	8.22481	5.3841	0.917891	0.203581	18.6853	0.282	0.467	This study
349	66.385	brown mudstone	86.7482	9.13292	2.15717	1.96171	9.49841	0.350293	89.2814	0.271	1.187	This study
354	66.447	brown mudstone	54.2638	37.8525	4.14539	3.73828	1.43356	0.174708	42.811	0.33	0.948	This study
359.5	66.516	grey mudstone	83.8335	9.96273	3.87012	2.33362	8.41471	0.386788	56.3503	0.284	1.012	This study
368.6	66.632	brown mudstone	88.1146	8.1068	2.82256	0.956059	10.8692	0.28771	131.674	0.222	1.586	This study
380	66.784	brown mudstone	85.4991	11.1863	1.06611	2.24858	7.64322	0.399659	48.3595	0.354	1.167	Gao et al., 2015
386	66.898	brown mudstone	67.6773	24.7119	3.46441	4.14645	2.73865	0.34874	32.2458	0.235	1.53	This study
388	66.936	brown mudstone	88.3143	9.72514	1.0051	0.955492	9.08103	0.295174	135.362	0.31	1.078	This study
402.5	67.233	green mudstone	63.4743	29.9006	2.56812	4.05693	2.12284	0.214465	36.5026	0.268	0.733	This study
403	67.243	brown mudstone	89.3841	8.176	1.04846	1.39142	10.9325	0.335909	125.583	0.317	1.437	This study
403.5	67.252	green mudstone	84.6915	12.658	0.962731	1.68777	6.69074	0.297639	101.416	0.283	2.165	This study
405	67.281	brown mudstone	87.5427	9.55434	1.62244	1.2805	9.16261	0.380742	103.827	0.294	1.321	This study
408	67.338	brown mudstone	84.8584	11.0927	2.50348	1.54544	7.64997	0.379514	70.8603	0.382	1.155	This study
409	67.357	brown mudstone	63.629	31.5995	1.6717	3.09978	2.01361	0.294118	71.3694	0.368	1.219	This study
410	67.376	brown mudstone	44.8827	47.2535	3.33336	4.53038	0.949828	0.21055	52.5208	0.298	0.614	Gao et al., 2015
411	67.393	brown mudstone	85.5445	10.1185	3.00835	1.32868	8.45426	0.445778	79.262	0.365	1.722	This study
416.1	67.467	brown mudstone	86.1878	9.83496	2.27639	1.70084	8.76341	0.376374	89.4121	0.33	1.704	This study
416.2	67.469	green mudstone	28.7401	60.9251	2.94728	7.38759	0.471728	0.236812	16.8519	0.29	0.141	This study
417.1	67.48	green mudstone	55.1907	39.2807	1.5584	3.9702	1.40503	0.218554	54.9744	0.385	0.542	This study
417.2	67.484	brown mudstone	90.7162	6.40626	1.55043	1.32715	14.1606	0.27007	151.353	0.307	0.883	This study
417.5	67.487	brown mudstone	86.2315	10.9829	1.43381	1.35181	7.85142	0.333059	91.5482	0.259	1.516	This study
430.1	67.695	green mudstone	93.1102	4.83099	0.985383	1.07342	19.2735	0.296115	114.783	0.269	0.977	This study
430.2	67.697	brown mudstone	88.8891	8.12567	1.51673	1.46853	10.9393	0.281827	122.454	0.327	1.211	This study
432	67.73	brown mudstone	94.8677	3.14556	0.931063	1.05564	30.1593	0.374106	145.623	0.288	0.876	This study
442	67.933	brown mudstone	85.2014	11.1627	1.9216	1.7143	7.6327	0.328758	75.0327	0.359	1.402	This study
446	68.016	green mudstone	72.6544	24.2379	1.46615	1.64158	2.99756	0.203532	86.6231	0.336	0.895	This study
450	68.1	brown mudstone	92.1786	6.37447	0.694737	0.752199	14.4606	0.227968	149.917	0.297	1.102	Gao et al., 2015
452	68.142	brown mudstone	94.4882	4.6607	0.397528	0.453603	20.2734	0.24852	147.885	0.291	1.086	This study
464	68.417	grey mudstone	82.7933	13.7872	1.84464	1.57478	6.00508	0.298991	78.9587	0.3	1.781	This study
465	68.43	brown mudstone	88.0115	8.50902	1.86813	1.61132	10.3433	0.410472	87.6426	0.335	1.38	This study
466	68.444	grey mudstone	91.7031	6.96415	0.440938	0.891784	13.1679	0.291544	110.871	0.34	1.748	This study
468	68.471	green mudstone	95.0675	3.76964	0.597997	0.564864	25.2193	0.227358	205.645	0.277	1.251	This study
470	68.498	green mudstone	77.3678	19.703	1.78559	1.14361	3.92671	0.224094	69.6784	0.327	1.353	Gao et al., 2015
471	68.511	green mudstone	83.8038	13.9887	1.01169	1.19577	5.99081	0.303439	48.2185	0.358	1.593	This study
472	68.525	green mudstone	94.9324	4.05786	0.724725	0.285051	23.3947	0.302707	173.482	0.332	1.352	This study
473	68.538	green mudstone	82.2844	14.2097	1.74814	1.75779	5.79071	0.289737	63.2812	0.298	1.599	This study
474	68.552	green mudstone	79.7641	15.5304	3.1072	1.59837	5.13601	0.270645	74.7247	0.313	1.549	This study
476	68.579	green mudstone	94.2782	4.70024	0.460925	0.560631	20.0582	0.442852	177.719	0.322	1.593	This study
477	68.592	green mudstone	94.9226	4.05298	0.574944	0.449474	23.4205	0.266282	122.152	0.34	1.461	This study
478	68.606	green mudstone	90.4531	7.24842	1.41283	0.885652	12.479	0.299198	147.654	0.301	1.767	This study
479	68.619	green mudstone	84.1327	11.3304	3.13137	1.40558	7.42539	0.331924	96.4207	0.411	1.769	This study
480	68.632	green silty mudstone	88.5881	8.86787	1.34201	1.20206	9.98978	0.283171	87.9449	0.312	1.295	Gao et al., 2015
480.1	68.634	green mudstone	90.933	6.71449	1.63664	0.715872	13.5428	0.278534	137.573	0.334	1.345	This study
481	68.645	green mudstone	80.4187	13.7975	3.25494	2.5289	5.82849	0.482328	84.4779	0.374	1.754	This study
482	68.658	green mudstone	91.5298	6.11238	1.18243	1.17544	14.9745	0.328991	143.225	0.411	1.402	This study
483	68.672	green mudstone	72.6044	22.6896	3.27129	1.43467	3.1999	0.288171	96.7178	0.336	1.392	This study
485	68.698	green mudstone	81.2831	10.491	4.28502	3.94086	7.74789	0.626053	22.4559	0.473	1.253	This study
487	68.725	brown mudstone	92.5367	5.45831	1.40199	0.602977	16.9534	0.282022	191.136	0.323	1.167	This study
488.3	68.743	brown mudstone	93.5503	4.42006	1.05664	0.972972	21.1649	0.236987	186.302	0.275	1.133	This study
494	68.817	brown mudstone	91.8309	5.0335	2.00663	1.12896	18.244	0.383462	134.317	0.26	1.147	This study
498	68.869	green mudstone	76.1105	21.5221	1.02828	1.33913	3.53638	0.261444	102.871	0.361	1.706	This study
500	68.894	brown mudstone	63.625	32.5266	1.4019	2.44651	1.95609	0.260485	72.9996	0.41	1.301	Gao et al., 2015
500.1	68.896	green mudstone	83.3454	14.007	1.13092	1.51668	5.95025	0.32676	95.3691	0.359	1.749	This study
501	68.907	green mudstone	80.7649	16.837	1.0844	1.31364	4.79686	0.272564	107.174	0.382	2.011	This study
502	68.92	green mudstone	88.6157	9.80645	0.515824	1.06205	9.03647	0.239245	113.361	0.355	1.371	This study
503	68.933	green mudstone	88.7626	8.80789	1.00334	1.42618	10.0776	0.295928	135.227	0.309	1.193	This study
504	68.946	green mudstone	83.768	13.9927	0.78396	1.45525	5.98653	0.264968	78.3636	0.347	1.697	This study
505	68.959	green mudstone	87.5842	10.0384	1.13773	1.23974	8.72494	0.269829	119.161	0.306	1.235	This study
506	68.972	brown mudstone	93.1369	5.24006	0.914457	0.708594	17.774	0.355327	96.5411	0.305	1.079	This study
507	68.985	green mudstone	90.5088	6.95893	1.48483	1.04743	13.0061	0.275571	119.477	0.308	1.138	This study
507	68.986	brown mudstone	83.2649	14.0227	1.00633	1.70614	5.93788	0.238384	92.3665	0.344	1.231	This study
508	68.998	green mudstone	71.7558	24.5983	1.51264	2.13323	2.9171	0.319947	56.8141	0.41	1.344	This study
510	69.023	brown mudstone	82.2086	12.8716	3.28732	1.63246	6.38681	0.345492	102.807	0.28	1.547	Gao et al., 2015
514	69.072	brown mudstone	85.825	10.8814	1.75425	1.53934	7.88729	0.365504	131.037	0.317	1.447	This study
516.7	69.105	brown mudstone	82.4712	12.2593	2.98655	2.283	6.72724	0.310524	91.4587	0.293	1.218	This study
520	69.147	green mudstone	89.7325	7.89751	1.38491	0.985113	11.3621	0.362888	101.071	0.331	1.305	Gao et al., 2015
522	69.172	green mudstone	81.9622	16.2376	0.57253	1.22767	5.04767	0.261268	73.1498	0.31	1.321	This study
524	69.197	green mudstone	91.228	6.81495	1.13944	0.817619	13.3864	0.321329	96.2494	0.273	1.263	This study
526	69.222	green mudstone	92.1319	5.58357	1.31416	0.970352	16.5006	0.313968	136.83	0.301	1.257	This study
531.5	69.292	green mudstone	76.7188	17.3721	3.02491	2.88418	4.4162	0.325847	48.8463	0.324	1.803	This study
533	69.312	brown mudstone	68.1296	24.4216	4.03624	3.4125	2.78973	0.2676	63.2313	0.375	1.396	This study
536	69.35	green mudstone	85.9936	11.001	1.34279	1.66265	7.81692	0.225533	85.8552	0.255	1.293	This study
538	69.376	green mudstone	86.5714	10.7768	1.57053	1.08125	8.0331	0.255816	107.506	0.302	1.446	This study
539	69.389	green mudstone	87.0815	10.55	1.50603	0.862511	8.25419	0.268868	111.098	0.32	1.425	This study
540	69.401	green mudstone	64.159	33.6119	0.689197	1.53996	1.90882	0.177352	74.6322	0.394	1.212	Gao et al., 2015
542	69.427	green mudstone	88.2846	9.41352	1.91736	0.384562	9.37848	0.234168	83.4779	0.224	1.282	This study
543.5	69.447	grey mudstone	92.6521	5.9142	0.439227	0.994509	15.666	0.283277	147.598	0.299	1.169	This study
545	69.467	grey mudstone	91.9822	6.50672	0.601908	0.909147	14.1365	0.27222	136.078	0.273	1.136	This study
556.5	69.617	green mudstone	75.0149	20.5032	2.02241	2.45951	3.65869	0.237208	72.5245	0.383	1.459	This study
558	69.637	brown mudstone	7.66154	81.5481	3.96174	6.82866	0.0939512	0.212522	30.8343	0.389	0.397	This study
558.5	69.643	green mudstone	16.974	76.1375	0.872219	6.01626	0.222939	0.239584	35.5483	0.445	0.319	This study
559	69.65	brown mudstone	63.4852	32.8255	1.56037	2.12891	1.93402	0.228651	78.6955	0.384	1.159	This study
560	69.663	brown mudstone	87.594	9.47085	1.86926	1.06593	9.2488	0.30534	112.345	0.295	1.278	Gao et al., 2015
577	69.887	brown mudstone	83.9	13.9873	0.570576	1.54216	5.99829	0.335565	88.45	0.308	1.453	This study
577.5	69.894	green mudstone	50.7412	44.6966	1.32864	3.23357	1.13524	0.226473	60.9269	0.483	0.708	This study
593	70.076	brown mudstone	88.4123	9.28249	1.07333	1.23185	9.52463	0.287778	161.37	0.372	1.25	This study
594	70.085	brown mudstone	88.7862	8.97949	0.811296	1.42305	9.88767	0.300447	116.92	0.335	1.104	This study
605	70.191	grey silty mudstone	14.7316	72.5574	4.49875	8.21225	0.203033	0.293809	40.9203	0.488	0.298	This study
606	70.2	brown mudstone	58.1335	35.3981	2.1679	4.30051	1.64228	0.32892	64.2624	0.375	1.302	This study
611.5	70.253	brown mudstone	77.3585	18.4582	1.75163	2.43163	4.19101	0.34698	62.0344	0.295	1.332	Gao et al., 2013
612	70.258	brown silty mudstone	83.0424	13.2195	1.77894	1.95919	6.2818	0.411662	55.7856	0.24	1.207	Gao et al., 2013
612.5	70.263	brown silty mudstone	85.8886	11.3822	1.45604	1.27315	7.54585	0.265859	136.163	0.24	1.438	Gao et al., 2013
613	70.268	brown mudstone	80.7422	14.7509	2.21376	2.2931	5.47371	0.287392	49.2832	0.222	1.344	Gao et al., 2013
620.5	70.34	green silty mudstone	28.8497	61.2076	4.47031	5.47233	0.471342	0.147844	38.3386	0.399	0.519	Gao et al., 2013
621	70.345	green silty mudstone	43.799	44.1794	5.33178	6.68979	0.99139	0.178752	38.6224	0.384	0.78	Gao et al., 2013
625	70.384	green mudstone	16.6344	67.96	7.70129	7.70434	0.244767	0.180802	20.55	0.303	0.24	Gao et al., 2013
625.5	70.389	brown mudstone	15.2268	73.486	5.36973	5.91741	0.207207	0.196786	42.4551	0.473	0.326	Gao et al., 2013
626	70.394	brown silty mudstone	1.40692	89.1046	3.10201	6.38643	0.0157895	0.139566	23.8321	0.329	0.053	Gao et al., 2013
626.5	70.399	brown mudstone	8.7205	79.6938	3.46109	8.1246	0.109425	0.189301	15.0888	0.3	0.12	Gao et al., 2013
627	70.403	brown mudstone	9.77672	81.3597	2.05911	6.80451	0.120167	0.141421	18.3018	0.336	0.142	Gao et al., 2013
627.5	70.408	green silty mudstone	5.6629	86.3324	1.53172	6.47299	0.0655942	0.156634	22.0104	0.396	0.247	Gao et al., 2013
628	70.413	green mudstone	16.5093	75.8723	1.62013	5.99828	0.217593	0.151524	21.2025	0.321	0.331	Gao et al., 2013
628.5	70.418	green silty mudstone	85.7063	11.7842	0.905987	1.60352	7.273	0.259235	61.0171	0.356	1.419	Gao et al., 2013
643.5	70.623	grey mudstone	93.2866	4.53186	0.302713	1.8788	20.5846	0.191326	96.7539	0.265	0.629	Gao et al., 2013
644	70.63	grey mudstone	95.6879	2.54594	0.416915	1.34929	37.5845	0.166763	77.574	0.263	0.478	Gao et al., 2013
644.5	70.64	grey silty mudstone	93.2948	3.59755	1.128	1.97968	25.9328	0.234092	85.6694	0.248	0.706	Gao et al., 2013
645	70.649	grey silty mudstone	91.282	5.13087	1.47485	2.11228	17.7908	0.192094	65.6362	0.223	0.664	Gao et al., 2013
645.5	70.658	grey silty mudstone	91.3852	4.65133	2.10489	1.85853	19.6471	0.176053	74.6813	0.24	0.641	Gao et al., 2013
646	70.668	grey silty mudstone	89.6807	5.35447	2.40355	2.56127	16.7488	0.273135	79.1289	0.23	0.762	Gao et al., 2013
646.5	70.677	grey mudstone	90.8095	4.84955	2.01825	2.32272	18.7253	0.306539	103.531	0.273	0.852	Gao et al., 2013
647	70.686	grey mudstone	88.3271	6.73494	2.35555	2.58244	13.1148	0.24636	71.5061	0.305	0.847	Gao et al., 2013
647.5	70.696	grey mudstone	89.436	5.79145	2.04564	2.72695	15.4427	0.25722	95.9688	0.283	0.853	Gao et al., 2013
648	70.705	grey mudstone	88.3949	6.88309	1.94213	2.77991	12.8423	0.287351	68.8557	0.237	0.838	Gao et al., 2013
648.5	70.714	grey mudstone	90.1469	6.60245	1.13239	2.11825	13.6536	0.254391	87.0794	0.319	0.868	Gao et al., 2013
649	70.724	grey mudstone	86.7466	8.71772	1.80553	2.73012	9.95062	0.201806	49.4097	0.244	0.809	Gao et al., 2013
649.5	70.733	grey mudstone	89.2621	6.79854	1.60467	2.33468	13.1296	0.309482	66.7879	0.269	0.899	Gao et al., 2013
650	70.742	grey mudstone	87.5305	8.39886	1.46588	2.60472	10.4217	0.258182	53.0402	0.237	0.809	Gao et al., 2013
650.5	70.751	grey mudstone	88.9252	7.18505	1.28807	2.6017	12.3764	0.232082	59.0553	0.229	0.833	Gao et al., 2013
651	70.761	grey mudstone	90.1792	6.47711	0.838176	2.50552	13.9227	0.319463	47.8189	0.239	0.886	Gao et al., 2013
651.5	70.77	grey mudstone	89.2922	7.85722	0.584849	2.26574	11.3644	0.23447	60.321	0.314	0.947	Gao et al., 2013
652	70.779	grey mudstone	90.0942	6.79767	0.790137	2.318	13.2537	0.238773	52.7302	0.246	0.928	Gao et al., 2013
652.5	70.789	grey mudstone	89.21	7.17181	0.888522	2.72971	12.439	0.320839	48.3142	0.259	0.986	Gao et al., 2013
653	70.798	grey mudstone	89.1929	8.02636	0	2.78069	11.1125	0.288978	38.6466	0.241	0.924	Gao et al., 2013
653.5	70.807	grey mudstone	90.843	6.02245	0.646858	2.48768	15.0841	0.272804	47.4113	0.279	0.912	Gao et al., 2013
654	70.817	grey mudstone	89.2303	7.06678	0.698248	3.00465	12.6267	0.289112	44.7233	0.251	0.86	Gao et al., 2013
654.5	70.826	grey mudstone	90.7235	6.40712	0.732826	2.13653	14.1598	0.291692	32.204	0.264	0.903	Gao et al., 2013
655	70.835	grey mudstone	90.8217	6.68374	0.352925	2.14165	13.5885	0.239086	32.623	0.269	1.013	Gao et al., 2013
655.5	70.844	grey mudstone	91.4064	6.1919	0.622981	1.77872	14.7622	0.291412	39.0904	0.37	0.984	Gao et al., 2013
656	70.852	grey mudstone	91.4895	6.23178	0.533045	1.74567	14.6811	0.244481	34.0843	0.3	1.001	Gao et al., 2013
656.5	70.844	grey mudstone	92.8721	5.12785	0.330397	1.6697	18.1113	0.303954	26.393	0.276	1.011	Gao et al., 2013
657	70.87	grey mudstone	88.8725	6.7595	1.09914	3.26889	13.1478	0.260357	12.5672	0.206	0.967	Gao et al., 2013
657.5	70.878	grey mudstone	83.9544	7.54038	1.86678	6.63842	11.134	0.217322	8.5551	0.255	1.024	Gao et al., 2013
658	70.887	grey mudstone	88.5205	6.52329	0.955786	4.00047	13.5699	0.268131	14.3498	0.21	1.011	Gao et al., 2013
658.5	70.896	grey mudstone	89.2776	7.32712	0.859073	2.53623	12.1845	0.280593	12.8845	0.256	0.949	Gao et al., 2013
659	70.904	grey mudstone	89.0634	6.94713	0.702319	3.28713	12.8202	0.260905	13.9721	0.235	0.991	Gao et al., 2013
659.5	70.913	grey mudstone	87.4448	7.78098	1.16256	3.6117	11.2383	0.267386	20.9747	0.229	0.936	Gao et al., 2013
660	70.921	grey mudstone	87.6443	10.8062	0.279109	1.27038	8.11056	0.19407	51.7681	0.392	1.283	Gao et al., 2013
660.5	70.93	green silty mudstone	89.3636	8.49557	0.245903	1.8949	10.5189	0.223402	55.843	0.303	0.976	Gao et al., 2013
661	70.939	green silty mudstone	88.4222	8.95624	0.325555	2.29599	9.8727	0.283173	38.3003	0.206	0.981	Gao et al., 2013
667	71.039	green mudstone	79.8037	15.7877	1.84481	2.56376	5.0548	0.265805	67.463	0.322	1.522	Gao et al., 2013
667.5	71.046	brown mudstone	69.583	23.3605	2.26944	4.78705	2.97866	0.207895	35.0255	0.291	1.296	Gao et al., 2013
668	71.052	brown mudstone	71.7433	23.1967	1.66253	3.39753	3.09282	0.256175	56.9271	0.336	2.047	Gao et al., 2013
668.5	71.059	green silty mudstone	93.9388	3.47535	1.14266	1.44315	27.0301	0.366315	74.7991	0.214	0.767	Gao et al., 2013
682	71.235	green silty mudstone	84.031	12.0036	1.25223	2.71323	7.00049	0.354538	70.899	0.305	1.076	This study
684	71.258	green silty mudstone	78.421	14.2269	3.63394	3.71822	5.51218	0.323448	42.6533	0.262	1.156	This study
699	71.433	green mudstone	1.15262	89.6659	3.40859	5.77286	0.0128546	0.173464	25.1859	0.381	0.092	This study
699.5	71.439	brown mudstone	7.36605	81.1487	4.16456	7.32069	0.0907722	0.17442	22.5526	0.434	0.22	This study
700	71.445	brown mudstone	14.1739	76.3391	3.77314	5.71386	0.18567	0.14424	31.3886	0.389	0.338	Gao et al., 2015
701	71.457	brown mudstone	53.8905	35.7792	4.93509	5.3952	1.5062	0.274315	28.3886	0.277	1.328	This study
702	71.469	brown mudstone	68.2071	24.2672	4.5857	2.94	2.81067	0.309779	61.4368	0.297	1.479	This study
703	71.482	grey silty mudstone	72.0605	21.9793	3.14205	2.81818	3.27857	0.287846	80.5566	0.328	1.155	This study
704	71.494	green mudstone	75.7321	17.8997	3.73935	2.62884	4.23092	0.300551	54.8504	0.258	1.099	This study
705	71.506	green mudstone	78.006	15.7964	2.71972	3.47787	4.93822	0.29952	55.0923	0.298	1.094	This study
707	71.531	green mudstone	81.2187	14.6285	2.33977	1.81307	5.5521	0.240413	52.9578	0.342	1.034	This study
722	71.715	grey mudstone	84.5381	6.65155	5.05634	3.75402	12.7095	0.290474	57.6426	0.239	0.852	This study
724	71.739	grey mudstone	81.3158	7.924	6.64532	4.11488	10.262	0.392543	62.2473	0.272	1.016	This study
726	71.763	grey mudstone	82.0871	8.00455	5.85725	4.05111	10.2551	0.321557	81.7975	0.282	1.029	This study
728	71.787	grey mudstone	77.4764	9.71961	7.41397	5.39005	7.97114	0.313433	39.5324	0.218	0.996	This study
730	71.811	grey mudstone	73.3346	13.4253	6.58038	6.65971	5.46241	0.305412	37.7631	0.265	0.988	Gao et al., 2015
732	71.836	green mudstone	79.9409	8.74657	6.18565	5.12687	9.13968	0.287758	51.7397	0.203	1.016	This study
734	71.861	green mudstone	82.7598	7.64186	5.1323	4.46601	10.8298	0.369279	63.5022	0.251	1	This study
736	71.885	green mudstone	82.2964	8.71104	5.18656	3.80599	9.44737	0.267243	50.3168	0.253	0.989	This study
738	71.91	green mudstone	90.0513	5.8589	1.22231	2.86746	15.37	0.415691	62.3839	0.228	0.893	This study
740	71.935	grey mudstone	83.2753	9.31292	3.33773	4.07405	8.94191	0.253041	45.5432	0.244	0.942	Gao et al., 2015
742	71.96	green mudstone	90.0205	6.10916	0.80318	3.06715	14.7353	0.350258	54.3258	0.237	0.876	This study
744	71.985	green mudstone	89.8112	6.43656	0.735786	3.01644	13.9533	0.303368	42.6629	0.253	0.967	This study
745	71.998	green mudstone	88.0585	8.20296	0.76892	2.96962	10.735	0.283538	30.4558	0.227	1.02	This study
747	72.023	green mudstone	87.088	8.1922	0.460738	4.25905	10.6306	0.330897	16.7157	0.243	1.011	This study
749	72.049	grey mudstone	87.303	8.06499	0.931308	3.70067	10.8249	0.276687	33.5292	0.258	1.011	This study
751.1	72.078	green mudstone	85.5026	11.0584	1.50485	1.93415	7.73191	0.356598	67.3839	0.258	1.295	This study
752	72.09	green mudstone	58.4652	32.4376	4.00945	5.08778	1.80239	0.271842	29.4485	0.301	1.543	This study
753	72.104	green mudstone	58.2632	32.1081	5.42759	4.20112	1.8146	0.338229	28.8366	0.347	1.357	This study
754	72.118	green mudstone	59.166	31.9487	4.75736	4.12794	1.8519	0.275098	41.5188	0.389	1.386	This study
763	72.244	green mudstone	71.259	22.7426	3.1299	2.86848	3.13328	0.260856	44.3474	0.301	1.589	This study
764	72.259	green mudstone	11.9153	76.6961	6.10794	5.28071	0.155357	0.256326	26.1427	0.313	0.423	This study
765	72.275	green mudstone	17.6585	73.9519	4.13816	4.25145	0.238783	0.225732	35.6053	0.348	0.465	This study
769.3	72.342	green mudstone	17.2904	69.8128	6.15474	6.74208	0.247667	0.237895	18.4506	0.299	0.112	This study
770	72.351	brown mudstone	58.7701	35.3103	2.87798	3.04165	1.66439	0.22781	78.9719	0.351	1.161	Gao et al., 2015
771	72.367	brown mudstone	36.7386	50.7347	6.56031	5.9664	0.724131	0.298857	18.4685	0.282	0.943	This study
772	72.382	brown mudstone	44.5461	44.0487	6.62965	4.77554	1.01129	0.338191	28.2662	0.32	1.235	This study
773	72.397	brown mudstone	76.8115	17.2181	3.68236	2.28807	4.46109	0.387679	74.95	0.257	1.153	This study
774	72.413	green mudstone	84.5714	11.6301	2.05406	1.74445	7.27176	0.353362	79.0616	0.285	1.074	This study
775	72.428	green mudstone	5.03027	87.0763	2.42533	5.46808	0.0577685	0.26734	20.0864	0.357	0.322	This study
776	72.443	brown mudstone	82.6641	13.7907	1.94151	1.60365	5.99419	0.242095	98.7904	0.323	0.875	This study
784	72.557	brown mudstone	41.0615	47.2103	5.46536	6.26287	0.869756	0.339161	24.2849	0.306	0.855	This study
788	72.615	brown mudstone	80.0932	14.8317	2.80079	2.27428	5.40013	0.337127	68.2317	0.256	0.929	This study
789	72.629	green mudstone	69.9315	24.6789	2.58901	2.80062	2.83366	0.323302	64.5659	0.283	1.522	This study
790	72.642	brown mudstone	74.1717	22.5597	1.43714	1.83146	3.2878	0.207371	125.96	0.362	1.003	Gao et al., 2015
801	72.782	green mudstone	73.3263	18.9074	4.1502	3.61603	3.87818	0.300681	87.3299	0.276	1.406	This study
807.5	72.867	brown mudstone	70.7221	22.3379	4.35439	2.5856	3.16601	0.392621	73.4782	0.267	1.015	This study
809	72.892	brown mudstone	56.4399	35.06	5.27426	3.22587	1.60981	0.279679	56.5134	0.307	1.388	This study
810	72.908	brown mudstone	74.7228	20.9575	2.00851	2.31113	3.56544	0.203033	151.851	0.364	1.159	Gao et al., 2015
811	72.924	brown mudstone	76.2486	17.9613	3.32738	2.46271	4.24515	0.3543	61.6578	0.269	1.02	This study
812	72.94	brown mudstone	42.8378	46.3122	5.47765	5.37237	0.924978	0.32168	43.5347	0.285	0.946	This study
813	72.957	brown mudstone	58.9857	33.013	4.40451	3.59675	1.78674	0.365724	34.1668	0.256	1.186	This study
814	72.973	brown mudstone	44.1902	45.0285	5.75745	5.02383	0.981382	0.350388	48.9414	0.279	0.89	This study
815	72.989	brown mudstone	50.8393	39.0871	5.02589	5.04777	1.30067	0.337276	39.5813	0.316	1.493	This study
816	73.005	brown mudstone	66.6273	27.5895	2.94963	2.83357	2.41495	0.20561	109.03	0.352	1.39	This study
817	73.022	brown mudstone	9.46012	76.4397	7.00047	7.09974	0.123759	0.281342	25.5508	0.329	0.279	This study
819	73.053	brown mudstone	76.5035	17.3174	3.29773	2.88142	4.41774	0.381824	96.1091	0.268	1.061	This study
824.5	73.139	green mudstone	67.0789	24.3402	4.33231	4.24855	2.75588	0.359696	64.5278	0.275	1.332	This study
826	73.163	green silty mudstone	74.7186	18.4345	3.77702	3.06987	4.05319	0.357395	69.0013	0.299	1.27	This study
828	73.194	brown mudstone	62.2193	28.7208	4.93254	4.12737	2.16635	0.455969	47.8656	0.303	1.235	This study
830	73.225	brown silty mudstone	89.2987	8.17195	1.22301	1.30631	10.9275	0.240066	210.291	0.398	1.099	Gao et al., 2015
832	73.26	brown mudstone	78.0079	14.9736	4.00568	3.01282	5.20971	0.504869	82.0311	0.283	1.12	This study
834	73.296	brown mudstone	74.4153	19.2616	3.14166	3.18143	3.86339	0.434213	65.8247	0.286	1.263	This study
837	73.35	brown mudstone	71.8791	21.1416	3.46068	3.51864	3.39988	0.411372	77.906	0.306	1.284	This study
840	73.404	brown silty mudstone	71.7723	22.3138	3.00397	2.90995	3.2165	0.204914	89.5479	0.3	1.105	Gao et al., 2015
842	73.44	brown mudstone	68.0577	22.941	4.9671	4.03418	2.96663	0.443675	57.3397	0.276	1.401	This study
844	73.482	grey mudstone	54.8114	34.0262	4.70643	6.45597	1.61086	0.346117	75.458	0.32	1.534	This study
846	73.523	green mudstone	74.6606	16.5114	4.23438	4.59358	4.52176	0.447093	81.9244	0.223	1.397	This study
847	73.544	green mudstone	72.2263	18.809	3.74359	5.22114	3.83999	0.485492	68.3535	0.314	1.525	This study
848	73.564	green mudstone	77.5899	14.2578	4.16513	3.98716	5.44192	0.374534	75.2735	0.219	1.501	This study
849	73.585	green mudstone	57.5739	34.2463	3.65298	4.52685	1.68117	0.321742	22.7314	0.265	1.138	This study
850	73.606	green mudstone	6.92986	82.367	4.17478	6.52834	0.0841339	0.215206	16.4412	0.296	0.167	Gao et al., 2015
851	73.627	green mudstone	58.7496	35.8436	1.69359	3.71319	1.63905	0.297972	30.6612	0.363	1.616	This study
852.1	73.649	green mudstone	3.72882	91.951	1.27442	3.04575	0.0405523	0.159771	34.0472	0.562	0.066	This study
853	73.666	brown mudstone	3.40065	87.3938	2.75967	6.44589	0.0389119	0.227044	20.9996	0.368	0.111	This study
856.5	73.734	brown mudstone	25.0769	62.0021	5.93671	6.9843	0.404453	0.302094	26.3643	0.333	0.136	This study
859	73.782	brown silty mudstone	29.8196	57.8989	6.72525	5.5562	0.515029	0.27321	28.4011	0.293	0.647	This study
860	73.801	brown mudstone	41.1917	49.8996	4.74542	4.16325	0.825492	0.229573	56.8566	0.33	0.778	Gao et al., 2015
861	73.821	brown mudstone	64.0964	29.1049	3.41403	3.38475	2.20226	0.253398	41.0606	0.241	1.51	This study
863	73.857	brown mudstone	44.8129	48.6888	3.17081	3.32752	0.920394	0.296012	52.2573	0.37	1.161	This study
865	73.89	brown mudstone	19.3609	69.2804	5.63666	5.72206	0.279456	0.245342	35.3494	0.345	0.103	This study
866	73.906	brown mudstone	38.7747	53.3744	3.45047	4.40042	0.726465	0.21235	53.6703	0.368	0.607	This study
867	73.922	grey silty mudstone	69.7378	25.3521	2.34679	2.5633	2.75077	0.363971	56.4484	0.39	1.668	This study
869	73.955	green mudstone	70.5919	22.4211	3.20989	3.77715	3.14847	0.336222	28.9024	0.291	1.583	This study
870	73.971	green silty mudstone	39.9897	53.1792	3.04358	3.78758	0.75198	0.230733	105.032	0.447	1.067	Gao et al., 2015
873.5	74.028	green mudstone	13.9512	76.6507	3.83792	5.56012	0.18201	0.251665	33.9872	0.371	0.282	This study
878.5	74.103	brown mudstone	64.5305	30.1342	2.51307	2.8223	2.14144	0.32366	32.7195	0.371	1.162	This study
880	74.125	brown mudstone	1.51987	90.98	3.25384	4.24629	0.0167056	0.184258	27.4998	0.374	0.06	Gao et al., 2015
882	74.154	brown mudstone	49.0378	42.0007	3.97643	4.9851	1.16755	0.283856	26.5797	0.273	1.182	This study
884.5	74.19	brown mudstone	62.2649	31.1779	2.54815	4.00907	1.99709	0.283305	35.9147	0.295	1.144	This study
887	74.227	brown mudstone	60.0007	33.3428	3.65527	3.00123	1.79951	0.269815	41.6507	0.277	1.451	This study
894	74.326	brown mudstone	56.5611	34.9247	4.12947	4.38472	1.61952	0.24586	39.7257	0.236	1.334	This study
896	74.354	brown mudstone	7.66066	83.8737	2.96532	5.50036	0.0913357	0.255318	42.9435	0.453	0.083	This study
898	74.382	brown mudstone	10.5689	74.9236	5.47258	9.03485	0.141063	0.249645	18.1729	0.284	0.157	This study
900	74.41	brown mudstone	2.43042	88.4444	2.23839	6.88683	0.0274797	0.189405	30.2882	0.345	0.038	Gao et al., 2015
902.5	74.445	brown mudstone	4.10501	81.654	6.0895	8.15145	0.0502733	0.235823	24.9767	0.361	0.107	This study
916.7	74.65	green mudstone	4.13309	84.1695	5.04304	6.65439	0.0491044	0.307075	13.8496	0.348	0.125	This study
929.2	74.818	brown mudstone	67.9548	18.4239	6.031	7.59035	3.68841	0.256511	37.6022	0.283	1.437	This study
930	74.828	grey silty mudstone	29.449	53.6919	5.80286	11.0563	0.548481	0.228434	35.4113	0.403	0.709	Gao et al., 2015
938	74.941	grey mudstone	64.4525	25.8628	4.86159	4.82308	2.49209	0.29389	61.7098	0.247	1.242	This study
940	74.971	green silty mudstone	50.0654	43.2661	1.68089	4.98764	1.15715	0.293302	48.0973	0.424	0.998	Gao et al., 2015
942	75	brown mudstone	26.353	60.0211	6.15853	7.46738	0.439063	0.264068	29.1089	0.27	0.728	This study
944	75.029	green mudstone	18.4451	68.9229	6.44554	6.18651	0.267619	0.257787	51.0889	0.307	0.362	This study
945.5	75.051	brown silty mudstone	50.7865	39.2805	4.7667	5.1663	1.29292	0.263265	66.368	0.314	1.222	This study
950	75.121	green silty mudstone	7.43339	82.7321	3.70609	6.12838	0.0898489	0.24107	46.2992	0.412	0.106	Gao et al., 2015
951.3	75.142	green mudstone	3.1083	82.8106	6.11639	7.96473	0.0375351	0.280365	33.4433	0.389	0.122	This study
957.6	75.239	brown mudstone	37.812	51.2253	5.79272	5.16996	0.738152	0.21458	52.5163	0.327	1.008	This study
960	75.272	green silty mudstone	16.4462	69.4589	5.76911	8.32576	0.236776	0.22962	59.9892	0.358	0.415	Gao et al., 2015
963	75.304	green mudstone	14.1971	77.2842	1.92024	6.59851	0.1837	0.231506	32.4485	0.425	0.155	This study
965.7	75.333	green silty mudstone	3.70365	86.8853	2.3181	7.09298	0.0426269	0.247322	19.0364	0.391	0.105	This study
967.7	75.354	brown mudstone	24.303	62.1597	5.68476	7.85256	0.390976	0.251489	17.7137	0.3	0.369	This study
969.5	75.373	brown silty mudstone	22.9411	69.663	2.33879	5.05717	0.329315	0.290903	24.2595	0.272	0.486	This study
970	75.378	brown silty mudstone	5.86661	83.0939	4.76622	6.27326	0.0706021	0.2754	40.6462	0.338	0.14	Gao et al., 2015
971.5	75.394	brown silty mudstone	36.1733	52.7283	5.7119	5.38644	0.686032	0.279517	33.5876	0.326	0.922	This study
974.5	75.425	grey silty mudstone	21.7871	63.5913	6.51981	8.10184	0.342611	0.286823	30.1601	0.313	0.353	This study
977	75.452	brown silty mudstone	11.1312	71.7425	7.91727	9.20905	0.155154	0.27758	16.0413	0.365	0.132	This study
981.5	75.507	grey silty mudstone	2.54708	82.9935	5.20588	9.25349	0.0306901	0.273181	17.5155	0.393	0.175	This study
985	75.552	brown silty mudstone	7.4388	71.9923	7.83349	12.7354	0.103328	0.284486	12.7662	0.342	0.03	This study
987.3	75.582	brown silty mudstone	5.25575	79.8402	7.00696	7.89705	0.0658284	0.30483	11.7828	0.38	0.095	This study
1002	75.786	brown silty mudstone	3.05492	80.3431	7.56361	9.0384	0.0380235	0.287904	14.7956	0.338	0.303	This study
1004	75.816	brown silty mudstone	1.85331	82.5066	7.45477	8.18528	0.0224626	0.282757	10.4453	0.309	0.082	This study
1006	75.846	brown silty mudstone	13.2316	67.742	8.50154	10.5249	0.195323	0.298714	15.2385	0.358	0.112	This study
1008	75.876	brown silty mudstone	24.9113	64.3036	4.74087	6.04418	0.387401	0.341069	11.4899	0.311	0.643	This study
1010.1	75.909	brown silty mudstone	13.0045	70.6788	11.6244	4.69226	0.183994	0.284104	12.6691	0.411	0.347	Gao et al., 2015
*References
Gao, Y., Wang, C., Liu, Z., Zhao, B., and Zhang, X., 2013, Clay mineralogy of the middle Mingshui Formation (upper Campanian to lower Maastrichtian) from the SKIn borehole in the Songliao Basin, NE China: Implications for palaeoclimate and provenance: Palaeogeography, Palaeoclimatology, Palaeoecology, v. 385, p. 162-170.
Gao, Y., Wang, C., Liu, Z., Du, X., and Ibarra, D. E., 2015, DIAGENETIC AND PALEOENVIRONMENTAL CONTROLS ON LATE CRETACEOUS CLAY MINERALS IN THE SONGLIAO BASIN, NORTHEAST CHINA: Clays and Clay Minerals, v. 63, no. 6, p. 469-484.
